# Supplementary material for: Dietary Carotenoids and Non-Alcoholic Fatty Liver Disease among US Adults, NHANES 2003–2014
Source: PubMed Central journal article supplement (PMC6566688; doi:10.3390/nu11051101), 2019-05-17
Supplement: nutrients-11-01101-s001.pdf [file nutrients-11-01101-s001.pdf]

**Supplementary Table S1.** Beta coefficients (standard error), p-values, for association between quartile of carotenoid intake, relative to quartile 1, and US Fatty Liver Index. The median (range) for each quartile of carotenoid intake is also displayed ( $\mu\text{g/day}$ ).

|                                               | Quartile 1      | Quartile 2                                | Quartile 3                                 | Quartile 4                                    | p-value for trend |
|-----------------------------------------------|-----------------|-------------------------------------------|--------------------------------------------|-----------------------------------------------|-------------------|
| $\alpha$ -carotene                            |                 |                                           |                                            |                                               |                   |
| Median (Range)                                | 10.0 (0–27)     | 49.8 (27–95.5)                            | 217.4 (96–477)                             | 1007.4 (477.5–72,037)                         |                   |
| Model 1                                       | Referent        | 0.34 (0.86), $p = 0.69$                   | -0.1 (0.98), $p = 0.92$                    | <b>-2.89 (0.9), <math>p &lt; 0.01</math></b>  | <b>&lt;0.001</b>  |
| Model 2                                       | Referent        | <b>2.67 (0.93), <math>p = 0.01</math></b> | <b>2.5 (1.01), <math>p = 0.02</math></b>   | 0.29 (1.05), $p = 0.78$                       | <b>&lt;0.001</b>  |
| $\beta$ -carotene                             |                 |                                           |                                            |                                               |                   |
| Median (Range)                                | 248.8 (0–435)   | 682.6 (435.5–1092.5)                      | 1738.8 (1094–2726.5)                       | 4691.2 (2728–246122)                          |                   |
| Model 1                                       | Referent        | 0.77 (0.98), $p = 0.44$                   | <b>-2.01 (0.81), <math>p = 0.01</math></b> | <b>-4.58 (0.99), <math>p &lt; 0.01</math></b> | <b>0.03</b>       |
| Model 2                                       | Referent        | 1.53 (1.03), $p = 0.14$                   | -0.22 (0.91), $p = 0.81$                   | <b>-2.33 (1.09), <math>p = 0.04</math></b>    | <b>0.01</b>       |
| $\beta$ -cryptoxanthin                        |                 |                                           |                                            |                                               |                   |
| Median (Range)                                | 5.7 (0–14.5)    | 26.3 (15–47)                              | 76.6 (47.5–124)                            | 229.5 (124.5–6088.5)                          |                   |
| Model 1                                       | Referent        | -1.65 (0.81), $p = 0.05$                  | -1.7 (1.11), $p = 0.13$                    | <b>-4.13 (1), <math>p &lt; 0.01</math></b>    | <b>0.02</b>       |
| Model 2                                       | Referent        | -0.54 (0.87), $p = 0.54$                  | 0.45 (1.25), $p = 0.72$                    | -1.13 (1.19), $p = 0.35$                      | 0.69              |
| Lycopene (Diet)                               |                 |                                           |                                            |                                               |                   |
| Median (Range)                                | 4.1 (0–564.5)   | 1273.5 (566.5–2233)                       | 3792.1 (2234.5–6417.5)                     | 12110 (6419–108852)                           |                   |
| Model 1                                       | Referent        | -1.15 (0.88), $p = 0.19$                  | -0.63 (1.02), $p = 0.54$                   | 0.80 (1.03), $p = 0.44$                       | 0.81              |
| Model 2                                       | Referent        | -0.55 (0.94), $p = 0.57$                  | -0.27 (1.11), $p = 0.81$                   | 0.51 (1.08), $p = 0.64$                       | 0.86              |
| Lutein/Zeaxanthin (Diet)                      |                 |                                           |                                            |                                               |                   |
| Median (Range)                                | 277.0 (0–430.5) | 600.2 (431–786.5)                         | 1050.7 (787–1506)                          | 2570.3 (1506.5–146912)                        |                   |
| Model 1                                       | Referent        | -0.04 (1.02), $p = 0.97$                  | -1.12 (1.01), $p = 0.27$                   | <b>-5.07 (1.04), <math>p &lt; 0.01</math></b> | <b>0.01</b>       |
| Model 2                                       | Referent        | 1.30 (1.08), $p = 0.23$                   | 0.95 (1.12), $p = 0.40$                    | <b>-2.54 (1.1), <math>p = 0.02</math></b>     | <b>&lt;0.001</b>  |
| Total Lycopene (Diet and Supplement)          |                 |                                           |                                            |                                               |                   |
| Median (Range)                                | 35.9 (0–590.5)  | 1313.8 (591–2276)                         | 3838.2 (2280–6451.5)                       | 12203 (6455–108852)                           |                   |
| Model 1                                       | Referent        | -0.63 (0.84), $p = 0.45$                  | -0.38 (0.96), $p = 0.69$                   | 0.93 (1.01), $p = 0.36$                       | 0.94              |
| Model 2                                       | Referent        | 0.22 (0.87), $p = 0.8$                    | 0.06 (1.01), $p = 0.95$                    | 0.73 (1.05), $p = 0.49$                       | 0.57              |
| Total Lutein/Zeaxanthin (Diet and Supplement) |                 |                                           |                                            |                                               |                   |
| Median (Range)                                | 281.6 (0–444.5) | 627.6 (445–816.5)                         | 1096.9 (817–1556)                          | 2751.3 (1556.5–161912)                        |                   |
| Model 1                                       | Referent        | -0.58 (0.99), $p = 0.56$                  | -1.33 (1.01), $p = 0.19$                   | <b>-5.64 (1.06), <math>p &lt; 0.01</math></b> | <b>0.01</b>       |
| Model 2                                       | Referent        | 0.78 (1.06), $p = 0.46$                   | 0.7 (1.15), $p = 0.54$                     | <b>-3.2 (1.12), <math>p = 0.01</math></b>     | <b>&lt;0.001</b>  |

\*Model 1 is adjusted for age, sex, and survey cycle year. Model 2 is adjusted for age, sex and survey year, along with HEI 2015 score. Bold text indicates statistically significant associations.

**Supplementary Table S2.** Beta coefficients (standard error), p-values, for association between quartile of serum carotenoids, relative to quartile 1, and US Fatty Liver Index. The median (range) for each quartile of serum concentration is also displayed ( $\mu\text{g/dL}$ ).

|                                         | Quartile 1      | Quartile 2                      | Quartile 3                      | Quartile 4                      | p-value for trend |
|-----------------------------------------|-----------------|---------------------------------|---------------------------------|---------------------------------|-------------------|
| <b><math>\alpha</math>-carotene</b>     |                 |                                 |                                 |                                 |                   |
| Median (Range)                          | 1.0 (0.2–1.5)   | 2.1 (1.6–3.0)                   | 4.0 (3.0–5.4)                   | 8.6 (5.4–96.5)                  |                   |
| Model 1                                 | Referent        | -2.82 (1.37), p = 0.05          | <b>-8.30 (1.36), p&lt;0.01</b>  | <b>-12.16 (1.22), p&lt;0.01</b> | <b>&lt;0.001</b>  |
| Model 2                                 | Referent        | -1.72 (2.54), P = 0.51          | <b>-8.98 (2.57), p&lt;0.01</b>  | <b>-12.43 (2.28), P&lt;0.01</b> | <b>&lt;0.001</b>  |
| <b><math>\beta</math>-carotene</b>      |                 |                                 |                                 |                                 |                   |
| Median (Range)                          | 6.0 (0.6–8.3)   | 10.5 (8.3–14.1)                 | 18.2 (14.1–25.1)                | 36.1 (25.1–292.9)               |                   |
| Model 1                                 | Referent        | <b>-8.53 (1.57), p&lt;0.01</b>  | <b>-12.3 (1.77), p&lt;0.01</b>  | <b>-19.29 (1.69), p&lt;0.01</b> | <b>&lt;0.001</b>  |
| Model 2                                 | Referent        | <b>-10.11 (2.05), P&lt;0.01</b> | <b>-13.06 (2.78), P&lt;0.01</b> | <b>-20.72 (2.19), P&lt;0.01</b> | <b>&lt;0.001</b>  |
| <b><math>\beta</math>-cryptoxanthin</b> |                 |                                 |                                 |                                 |                   |
| Median (Range)                          | 3.5 (0.6–4.9)   | 6.4 (4.9–8.2)                   | 10.3 (8.3–13.8)                 | 19.4 (13.8–93.1)                |                   |
| Model 1                                 | Referent        | -3.43 (1.64), p = 0.05          | <b>-8.45 (1.15), p&lt;0.01</b>  | <b>-11.12 (1.31), p&lt;0.01</b> | <b>&lt;0.001</b>  |
| Model 2                                 | Referent        | -2.22 (2.63), p = 0.41          | <b>-7.78 (1.72), p&lt;0.01</b>  | <b>-9.46 (2.52), p&lt;0.01</b>  | <b>&lt;0.001</b>  |
| <b>Lycopene</b>                         |                 |                                 |                                 |                                 |                   |
| Median (Range)                          | 19.2 (0.7–26.2) | 32.6 (26.2–37.9)                | 43.5 (37.9 – 51.1)              | 64.0 (51.2 – 148.0)             |                   |
| Model 1                                 | Referent        | -0.98 (1.99), p = 0.63          | -3.02 (2.42), p = 0.22          | <b>-6.01 (1.79), p&lt;0.01</b>  | <b>&lt;0.01</b>   |
| Model 2                                 | Referent        | -1.3 (2.13), p = 0.55           | -5.21 (3.25), p = 0.13          | <b>-6.03 (2.37), p = 0.02</b>   | <b>0.03</b>       |
| <b>Lutein/Zeaxanthin</b>                |                 |                                 |                                 |                                 |                   |
| Median (Range)                          | 8.6 (2.4–10.9)  | 13.0 (10.6–15.2)                | 17.7 (15.2–27.0)                | 26.0 (20.7–113.1)               |                   |
| Model 1                                 | Referent        | <b>-4.46 (1.72), p = 0.01</b>   | <b>-7.66 (1.59), p&lt;0.01</b>  | <b>-12.06 (1.56), p&lt;0.01</b> | <b>&lt;0.001</b>  |
| Model 2                                 | Referent        | -3.54 (2.73), p = 0.22          | <b>-7.9 (2.98), P = 0.02</b>    | <b>-12.28 (2.15), P&lt;0.01</b> | <b>&lt;0.001</b>  |

\*Model 1 is adjusted for age, sex, and survey cycle year. Model 2 is adjusted for age, sex and survey year, along with HEI 2015 score. Bold text indicates statistically significant associations.
